# Supplementary material for: High-Pressure Processing Effects on Microbiological Stability, Physicochemical Properties, and Volatile Profile of a Fruit Salad
Source: MDPI journal article supplement (doi:10.3390/foods13091304), 2024-04-24
Supplement: s1 [file s1]

## Supplementary materials

### Tables

**Table S1** – Aromatic compounds identified in the samples' headspace present in the literature.

| Compound family    | Compound name              | Matrix | Reference   |
|--------------------|----------------------------|--------|-------------|
| Acetate Esters     | 2-Methyl-1-butanol acetate | Melon  | [1]         |
|                    |                            | Pear   | [2]         |
|                    | Ethyl acetate              | Apple  | [3,4]       |
|                    |                            | Melon  | [5,6]       |
|                    | Propyl acetate             | Pear   | [7,8]       |
|                    |                            | Melon  | [6]         |
|                    | Butyl acetate              | Pear   | [8]         |
|                    |                            | Apple  | [9]         |
|                    | Pentyl acetate             | Melon  | [1]         |
|                    |                            | Pear   | [7,8]       |
|                    | Hexyl acetate              | Apple  | [9]         |
|                    |                            | Melon  | [5]         |
|                    | 2-Hexen-1-ol acetate       | Pear   | [7]         |
|                    |                            | Apple  | [4,9]       |
|                    | Heptyl acetate             | Melon  | [4,9]       |
|                    |                            | Pear   | [1,6]       |
| Non-acetate esters | (Z)- 6-Nonenyl acetate     | Pear   | [8,10]      |
|                    | Nonyl acetate              | Apple  | [3]         |
| Aldehydes          | Hexanal                    | Melon  | [11]        |
|                    |                            | Pear   | [7,8]       |
|                    | (E)-2-Hexenal              | Apple  | [4,13]      |
|                    |                            | Melon  | [13]        |
|                    | Heptanal                   | Pear   | [5]         |
|                    |                            | Melon  | [8]         |
|                    | (E)-2-Heptenal             | Melon  | [5,11,14]   |
|                    |                            | Melon  | [11]        |
|                    | Octanal                    | Melon  | [11,14]     |
|                    |                            | Melon  | [11]        |
|                    | (E)-2-Octenal              | Melon  | [11]        |
|                    |                            | Melon  | [11]        |
|                    | (Z)-6-Nonenal              | Melon  | [5,6,11,14] |
|                    |                            | Melon  | [11]        |
|                    | Nonanal                    | Melon  | [11]        |
|                    |                            | Melon  | [11]        |
| Alcohols           | 1-Hexanol                  | Melon  | [11]        |
|                    |                            | Pear   | [8,10]      |
|                    | 2-ethyl-1-hexanol          | Apple  | [3,9]       |
|                    |                            | Melon  | [11,14]     |
|                    | 1-Octanol                  | Pear   | [6]         |
|                    |                            | Melon  | [11]        |
|                    | 1-Octen-3-ol               | Pear   | [13]        |
|                    |                            | Melon  | [15]        |
|                    | 1-Nonanol                  | Melon  | [11]        |
|                    |                            | Pear   | [8]         |
|                    | (E)-2-Nonen-1-ol           | Melon  | [15]        |
|                    |                            | Pear   | [7]         |
|                    | (Z)-3-Nonen-1-ol           | Melon  | [5,11]      |
|                    |                            | Pear   | [7]         |
|                    | 2,6-Nonadien-1-ol          | Melon  | [7]         |
|                    |                            | Melon  | [11]        |
| Terpenes           | $\alpha$ -pinene           | Apple  | [16]        |
|                    |                            | Apple  | [3]         |
|                    | Limonene                   | Apple  | [4]         |
|                    |                            | Pear   | [7,10]      |
|                    | $\alpha$ -farnesene        | Apple  |             |
|                    |                            | Pear   |             |
|                    |                            | Apple  |             |
|                    |                            | Pear   |             |

**Table S2** – Total soluble solids of unprocessed and high pressure processed fruit salad. The values are expressed as °brix and presented as mean ± standard deviation.

| Sampling day | Raw Samples | ANOVA | HPP samples | ANOVA |
|--------------|-------------|-------|-------------|-------|
| 0            | 10.80±0.20  | A/a   | 11.07±0.12  | A/a   |
| 3            | 10.87±0.42  | A/a   | 10.40±0.20  | A/a   |
| 7            | 10.80±0.35  | A/a   | 10.43±1.01  | A/a   |
| 14           | 10.20±0.80  | A/a   | 10.93±0.46  | A/a   |
| 21           | 10.30±0.17  | A/a   | 10.20±0.53  | A/a   |
| 28           | 10.33±0.64  | A/a   | 10.00±1.06  | A/a   |
| 35           | 10.73±0.12  | A/a   | 11.27±0.46  | A/a   |

## Figures

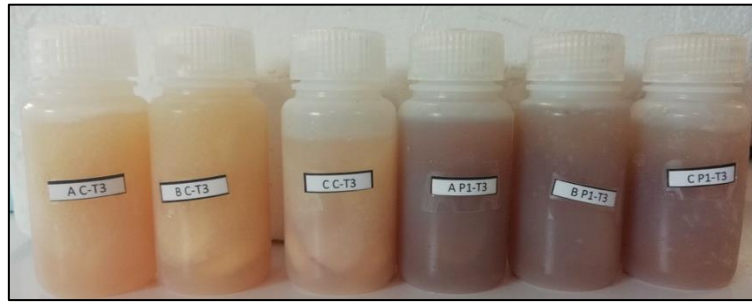

**Figure S1** - Picture of samples without ascorbic acid, taken at the 14<sup>th</sup> day of storage. The first three, from left to right, are raw samples, while the other three are HPP samples.

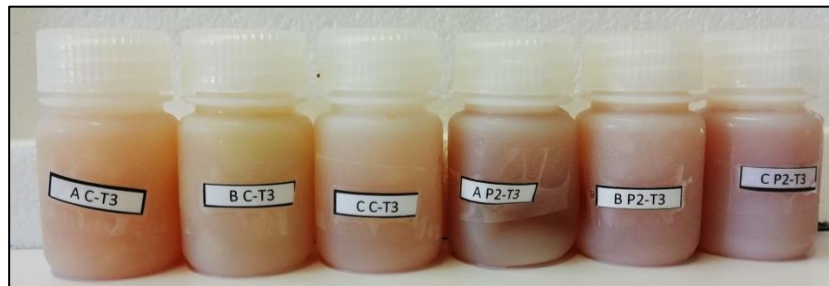

**Figure S2** - Picture of samples with ascorbic acid, taken at the 14<sup>th</sup> day of storage. The first three, from left to right, are raw samples, while the other three are HPP samples.

## References

1. Fernández-Trujillo, J.; Dos-Santos, N.; Martínez-Alcaraz, R.; Le Bleis, I. Non-Destructive Assessment of Aroma Volatiles from a Climacteric Near-Isogenic Line of Melon Obtained by Headspace Stir-Bar Sorptive Extraction. *Foods* **2013**, *2*, 401–414, doi:10.3390/foods2030401.
2. Goliáš, J.; Kožíšková, J.; Létal, J. Changes in Volatiles during Cold Storage and Subsequent Shelf-Life of “conference” Pears Treated with 1-MCP. *Acta Horticulturae* **2015**, *1079*, 465–471, doi:10.17660/ActaHortic.2015.1079.61.
3. Giannetti, V.; Boccacci Mariani, M.; Mannino, P.; Marini, F. Volatile Fraction Analysis by HS-SPME/GC-MS and Chemometric Modeling for Traceability of Apples Cultivated in the Northeast Italy. *Food Control* **2017**, *78*, 215–221, doi:10.1016/j.foodcont.2017.02.036.
4. Reis, S.F.A.R.; Rocha, S.M.; Barros, A.S.; Delgadillo, I.; Coimbra, M.A. Establishment of the Volatile Profile of “Bravo de Esmolfe” Apple Variety and Identification of Varietal Markers. *Food Chemistry* **2009**, *113*, 513–521, doi:10.1016/j.foodchem.2008.07.093.
5. Chaparro-Torres, L.A.; Bueso, M.C.; Fernández-Trujillo, J.P. Aroma Volatiles Obtained at Harvest by HS-SPME/GC-MS and INDEX/MS-E-Nose Fingerprint Discriminate Climacteric Behaviour in Melon Fruit. *Journal of the Science of Food and Agriculture* **2016**, *96*, 2352–2365, doi:10.1002/jsfa.7350.
6. Obando-Ulloa, J.M.; Moreno, E.; García-Mas, J.; Nicolai, B.; Lammertyn, J.; Monforte, A.J.; Fernández-Trujillo, J.P. Climacteric or Non-Climacteric Behavior in Melon Fruit. 1. Aroma Volatiles. *Postharvest Biology and Technology* **2008**, *49*, 27–37, doi:10.1016/j.postharvbio.2007.11.004.
7. Chen, Y.; Yin, H.; Wu, X.; Shi, X.; Qi, K.; Zhang, S. Comparative Analysis of the Volatile Organic Compounds in Mature Fruits of 12 Occidental Pear (*Pyrus Communis* L.) Cultivars. *Scientia Horticulturae* **2018**, *240*, 239–248, doi:10.1016/j.scienta.2018.06.014.
8. Taiti, C.; Marone, E.; Lanza, M.; Azzarello, E.; Masi, E.; Pandolfi, C.; Giordani, E.; Mancuso, S. Nashi or Williams Pear Fruits? Use of Volatile Organic Compounds, Physicochemical Parameters, and Sensory Evaluation to Understand the Consumer’s Preference. *European Food Research and Technology* **2017**, *243*, 1917–1931, doi:10.1007/s00217-017-2898-y.
9. Lee, J.; Jang, H.W.; Jeong, M.C.; Yoo, S.R.; Ha, J. Analysis of Volatile Compounds as Quality Indicators for Fuji Apples after Cold Storage. *Journal of Food Biochemistry* **2017**, *41*, 1–11, doi:10.1111/jfbc.12410.
10. Yi, X.K.; Liu, G.F.; Rana, M.M.; Zhu, L.W.; Jiang, S.L.; Huang, Y.F.; Lu, W.M.; Wei, S. Volatile Profiling of Two Pear Genotypes with Different Potential for White Pear Aroma Improvement. *Scientia Horticulturae* **2016**, *209*, 221–228, doi:10.1016/j.scienta.2016.06.034.
11. Fredes, A.; Sales, C.; Barreda, M.; Valcárcel, M.; Roselló, S.; Beltrán, J. Quantification of Prominent Volatile Compounds Responsible for Muskmelon and Watermelon Aroma by Purge and Trap Extraction Followed by Gas Chromatography-Mass Spectrometry Determination. *Food Chemistry* **2016**, *190*, 689–700, doi:10.1016/j.foodchem.2015.06.011.
12. Engel, K.; Heidlas, J.; Tressl, R. The Flavour of Tropical Fruits (Banana, Melon, Pineapple). In *Food Flavours. Part C. The Flavour of Fruits*; Morton, I.D., Macleod, A.J., Eds.; Elsevier B.V.: Amsterdam, 1990; pp. 201–206 ISBN 0-444-87362-7.
13. Paillard, N.M.M. The Flavour of Apples, Pears and Quinces. In *Food Flavours. Part C. The Flavour of Fruits*; Morton, I.D., Macleod, A.J., Eds.; Elsevier B.V.: Amsterdam, 1990; pp. 1–34 ISBN 0-444-87362-7.
14. Fernández-Trujillo, J.; Zarid, M.; Bueso, M.C. Methodology to Remove Strong Outliers of Non-Climacteric Melon Fruit Aroma at Harvest Obtained by HS-SPME GC-MS Analysis. *Separations* **2018**, *5*, doi:10.3390/separations5020030.
15. Oh, S.H.; Lim, B.S.; Hong, S.J.; Lee, S.K. Aroma Volatile Changes of Netted Muskmelon (*Cucumis Melo* L.) Fruit during Developmental Stages. **2011**, *52*, 590–595, doi:10.1007/s13580-011-0090-z.
16. Burdock, G.A. *Fenaroli’s Handbook of Flavor Ingredients*; 4th ed.; CRC Press LLC: Boca Raton, Florida, 2002; ISBN 0-8493-0946-8.
